# Supplementary material for: Room temperature synthesis of Bi25FeO39 and hydrothermal kinetic relations between sillenite- and distorted perovskite-type bismuth ferrites
Source: Royal Society of Chemistry journal article supplement (doi:10.1039/c4dt01825g), 2014-01-01
Supplement: c4dt01825g1.pdf [file c4dt01825g1.pdf]

SUPPLEMENTARY INFORMATION

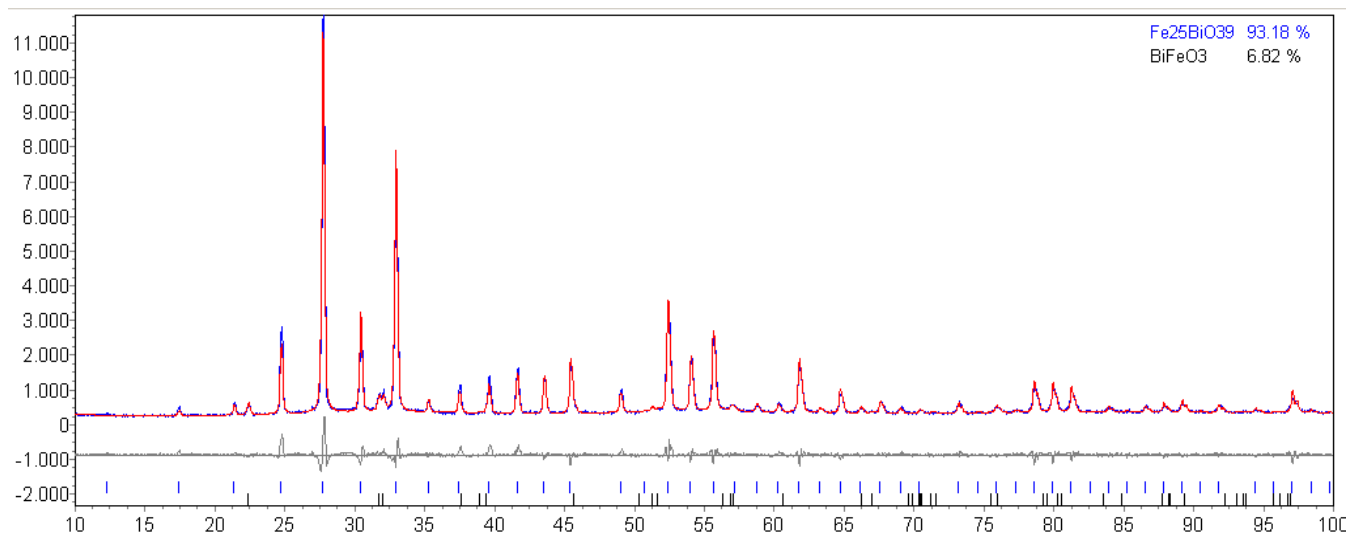

Figure S1. Rietveld refinement plot of mixture of Bi<sub>25</sub>FeO<sub>39</sub> and BiFeO<sub>3</sub> prepared at 180 °C for 90 min. The inset shows the obtained amounts (%) of bismuth ferrites.

**Table S1.** Atomic coordinates and isotropic parameters for Bi<sub>25</sub>FeO<sub>39</sub> prepared at room temperature.

| Atom   | Ox. | Wyck. | S.O.F.  | x/a         | y/b         | z/c         | Biso    |
|--------|-----|-------|---------|-------------|-------------|-------------|---------|
| Bi1    | 3   | 24f   | 1       | 0.17798(49) | 0.31866(8)  | 0.01400(2)  | 0.92(6) |
| Bi2/Fe | 3   | 2a    | 0.5/0.5 | 0           | 0           | 0           | 1.91(1) |
| O1     | -2  | 8c    | 1       | 0.67204(26) | 0.67204(26) | 0.67204(26) | 2.2(2)  |
| O2     | -2  | 24f   | 1       | 0.65096(78) | 0.74979(73) | 0.98355(26) | 2.2(2)  |
| O3     | -2  | 8c    | 1       | 0.89322(66) | 0.89322(66) | 0.89322(66) | 2.2(2)  |

**Table S2.** Table S1. Atomic coordinates and isotropic parameters for Bi<sub>25</sub>FeO<sub>39</sub> prepared

at 180 °C.

| Atom   | Ox. | Wyck. | S.O.F.  | x/a         | y/b         | z/c         | Biso    |
|--------|-----|-------|---------|-------------|-------------|-------------|---------|
| Bi1    | 3   | 24f   |         | 0.17607(86) | 0.31730(51) | 0.01490(8)  | 1.99(6) |
| Bi2/Fe | 3   | 2a    | 0.5/0.5 | 0           | 0           | 0           | 2.99(2) |
| O1     | -2  | 8c    |         | 0.689(4)    | 0.689(4)    | 0.689(4)    | 3.04(2) |
| O2     | -2  | 24f   |         | 0.63516(56) | 0.75154(44) | 0.98956(8)  | 3.04(2) |
| O3     | -2  | 8c    |         | 0.87871(88) | 0.87871(88) | 0.87871(88) | 3.04(2) |

**Table S3.** Table S1. Atomic coordinates and isotropic parameters for BiFeO<sub>3</sub> prepared at room temperature.

| Atom | Ox. | Wyck. | S.O.F. | x/a        | y/b        | z/c         | Biso    |
|------|-----|-------|--------|------------|------------|-------------|---------|
| Bi1  | 3   | 6a    |        | 0          | 0          | 0           | 0.89(9) |
| Fe1  | 3   | 6a    |        | 0          | 0          | 0.21962(32) | 0.08(1) |
| O1   | -2  | 18b   |        | 0.4301(30) | 0.0009(36) | 0.95189(99) | 0.03(4) |

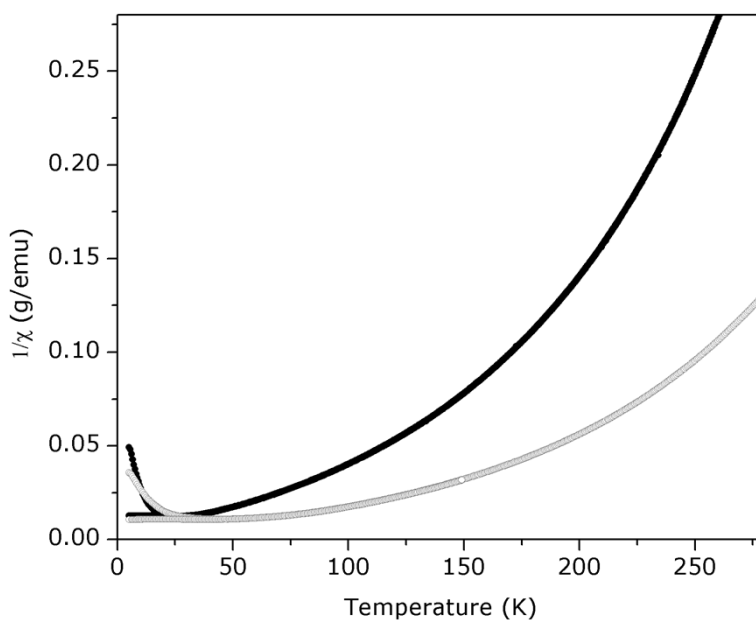

**Figure S2.** Temperature dependence of the field-cooled and zero field-cooled reciprocal susceptibility for Bi<sub>25</sub>FeO<sub>39</sub> prepared at room temperature (black curve) and Bi<sub>25</sub>FeO<sub>39</sub> prepared at 180 °C for 45 min (gray curve).

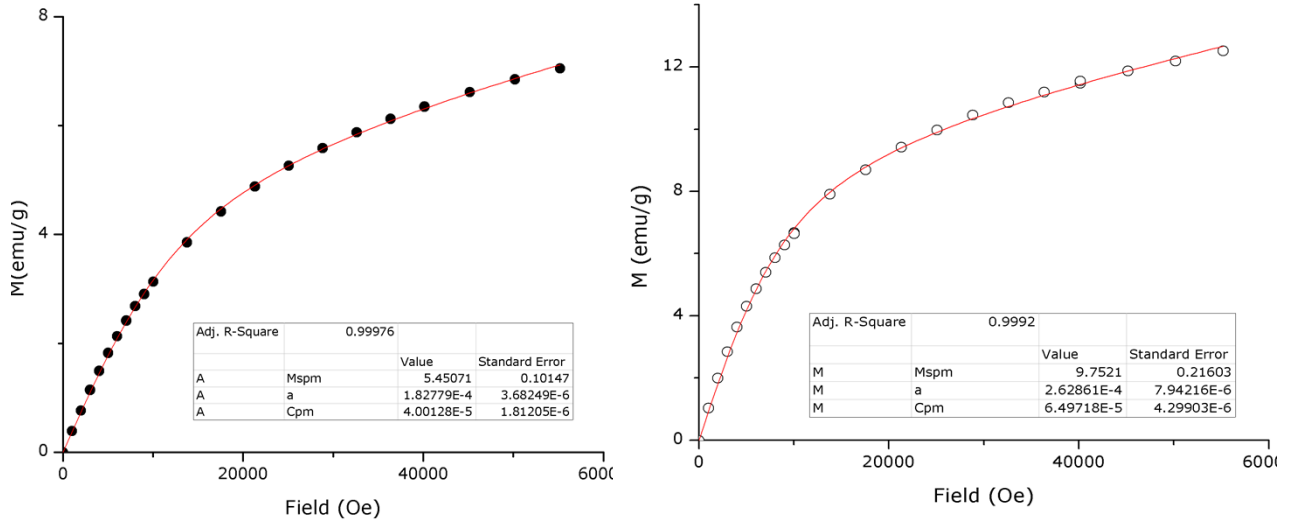

**Figure S3.**  $M(H)$  data fitted to a Langevin function with an added linear term:

$$M(H) = M_{spm} \left[ \coth \left( \frac{\mu H}{KT} \right) - \left( \frac{\mu H}{KT} \right)^{-1} \right] + HC_{pm}$$
, where  $M_{SPM}$  is the saturation magnetization of the superparamagnetic (SPM) part and  $\mu$  is the average magnetic moment of SPM phase.  $C_{PM}$  is the susceptibility of the paramagnetic contribution that is linear with the magnetic field  $H$ , for Bi<sub>25</sub>FeO<sub>39</sub> prepared at room temperature (right side) and Bi<sub>25</sub>FeO<sub>39</sub> prepared at 180 °C for 45

min (left side). In these picture the  $a$  value in the tables is:  $a = \left( \frac{\mu}{KT} \right)$ .
